# Supplementary material
Source: Springer Nature journal article supplement (https://www.springermedizin.de/resource/supplementary/12943_2012_1015_MOESM9_ESM.pdf/9552122)

# Transcription Factor expression in 6 cell lines

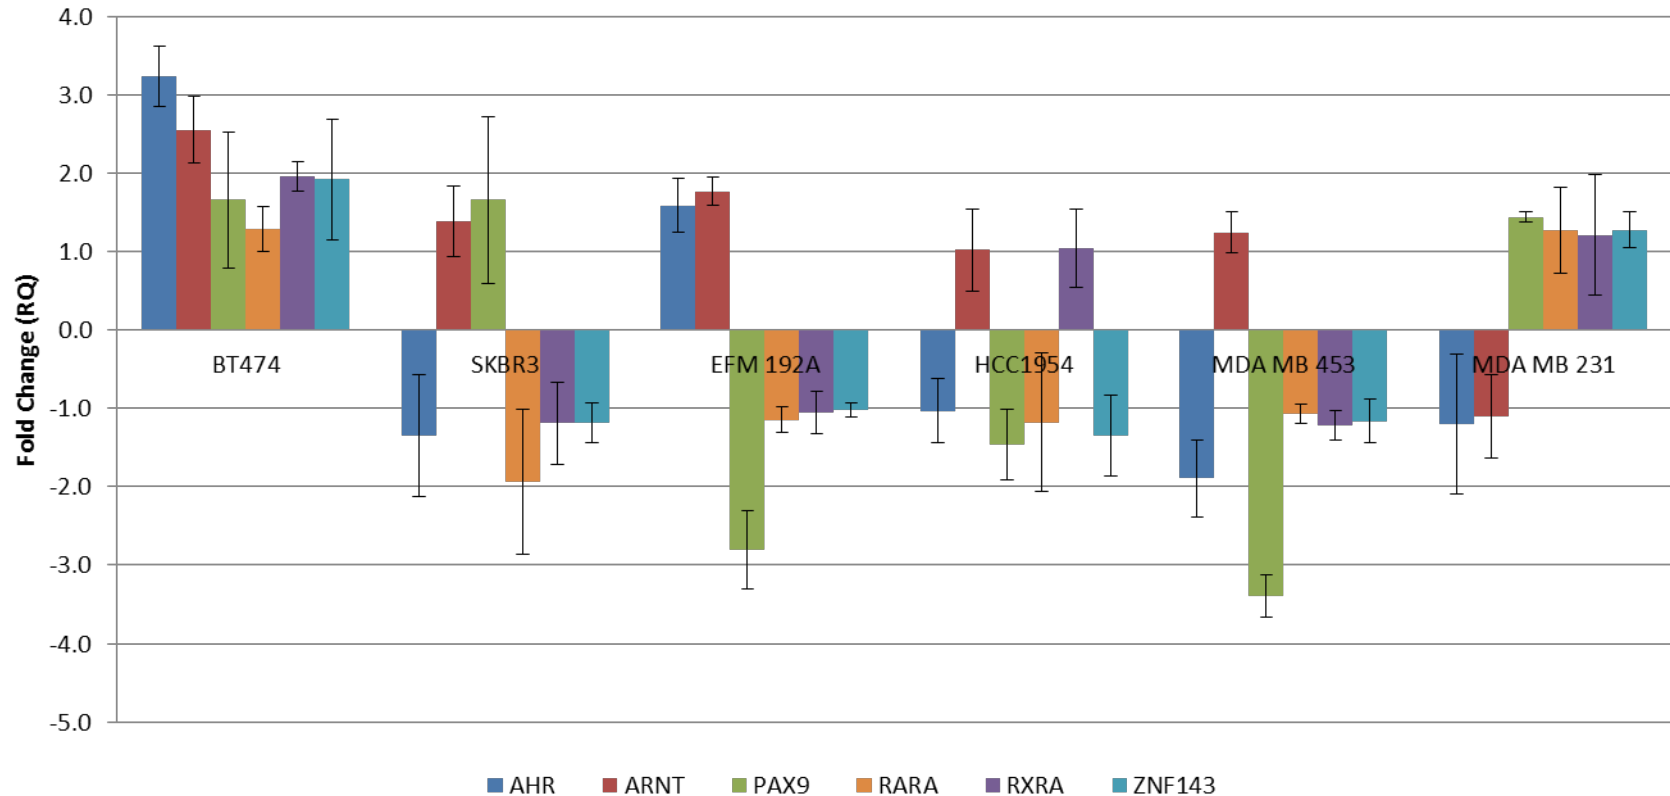

Supplement: MOESM9 [file 9552122]
